# Supplementary material for: Long-Term Associations between Human Cytomegalovirus Antibody Levels with All-Cause Mortality and Cardiovascular Outcomes in an Australian Community-Based Cohort
Source: MDPI journal article supplement (doi:10.3390/v14122676), 2022-11-29
Supplement: s1 [file s1]

**Table S1.** Top 10 leading cause of death in the Busselton Health Study.

| <b>Cause of Death</b>         | <b>Number (%)</b> |
|-------------------------------|-------------------|
| Myocardial infarction         | 19 (4.29)         |
| Stroke                        | 18 (4.06)         |
| Lung cancer                   | 17 (3.84)         |
| Alzheimer's disease           | 17 (3.84)         |
| Ischemic heart disease        | 15 (3.39)         |
| Pancreatic cancer             | 9 (2.03)          |
| Breast cancer                 | 9 (2.03)          |
| Atherosclerotic heart disease | 8 (1.81)          |
| Atrial fibrillation           | 8 (1.81)          |
| Pneumonia                     | 8 (1.81)          |

**Table S2.** Hazard ratios for baseline HCMV antibody levels (log-transformed) in relation to all-cause death, CVD death, ACS, and MACCE at 5- and 10-year follow-ups.

|                      | Model 1 <sup>3</sup> |         | Model 2 <sup>4</sup> |         | Model 3 <sup>5</sup> |         | Model 4 <sup>6</sup> |         |
|----------------------|----------------------|---------|----------------------|---------|----------------------|---------|----------------------|---------|
|                      | HR (95% CI)          | p-value |
| All-cause death      |                      |         |                      |         |                      |         |                      |         |
| 5 years              | 1.09 (0.97, 1.22)    | 0.131   | 1.07 (0.96, 1.20)    | 0.211   | 1.07 (0.96, 1.19)    | 0.244   | 1.06 (0.96, 1.18)    | 0.252   |
| 10 years             | 1.05 (0.99, 1.12)    | 0.074   | 1.05 (0.99, 1.11)    | 0.114   | 1.04 (0.98, 1.10)    | 0.162   | 1.04 (0.98, 1.10)    | 0.182   |
| CVD death            |                      |         |                      |         |                      |         |                      |         |
| 5 years              | 1.05 (0.89, 1.24)    | 0.570   | 1.03 (0.88, 1.21)    | 0.731   | 1.02 (0.87, 1.20)    | 0.772   | 1.03 (0.88, 1.21)    | 0.724   |
| 10 years             | 1.02 (0.92, 1.13)    | 0.721   | 0.99 (0.90, 1.10)    | 0.919   | 0.99 (0.89, 1.09)    | 0.817   | 0.99 (0.89, 1.09)    | 0.776   |
| ACS                  |                      |         |                      |         |                      |         |                      |         |
| 5 years              | 0.96 (0.86, 1.07)    | 0.461   | 0.95 (0.85, 1.06)    | 0.388   | 0.95 (0.85, 1.07)    | 0.408   | 0.96 (0.85, 1.07)    | 0.439   |
| 10 years             | 0.96 (0.90, 1.02)    | 0.202   | 0.96 (0.90, 1.02)    | 0.162   | 0.96 (0.90, 1.02)    | 0.198   | 0.96 (0.90, 1.02)    | 0.185   |
| MACCE 1 <sup>1</sup> |                      |         |                      |         |                      |         |                      |         |
| 5 years              | 1.05 (0.97, 1.14)    | 0.203   | 1.04 (0.97, 1.12)    | 0.289   | 1.04 (0.97, 1.12)    | 0.278   | 1.04 (0.97, 1.12)    | 0.283   |
| 10 years             | 1.04 (0.99, 1.08)    | 0.117   | 1.03 (0.99, 1.08)    | 0.188   | 1.03 (0.99, 1.07)    | 0.196   | 1.03 (0.98, 1.07)    | 0.215   |
| MACCE 2 <sup>2</sup> |                      |         |                      |         |                      |         |                      |         |
| 5 years              | 1.02 (0.94, 1.11)    | 0.640   | 1.01 (0.93, 1.11)    | 0.735   | 1.02 (0.93, 1.11)    | 0.681   | 1.02 (0.94, 1.11)    | 0.659   |
| 10 years             | 1.01 (0.95, 1.06)    | 0.841   | 1.00 (0.95, 1.05)    | 0.989   | 1.00 (0.95, 1.06)    | 0.922   | 1.00 (0.95, 1.06)    | 0.942   |

<sup>1</sup> composite of all-cause death, ACS, stroke, coronary artery revascularisation procedures

<sup>2</sup> composite of CVD death, ACS, stroke, coronary artery revascularisation procedures

<sup>3</sup> Model 1: Adjusted for sex and age

<sup>4</sup> Model 2: Model 1 plus additional adjustment for smoking, BMI, BP treatment, SBP, diabetes, cholesterol, HDL cholesterol, triglycerides, glucose, and CRP

<sup>5</sup> Model 3: Model 2 plus additional adjustment for COPD and eGFR

<sup>6</sup> Model 4: Model 3 plus additional adjustment for sCD14 and sCD163

ACS: acute coronary syndrome, BMI: body mass index, BP: blood pressure, COPD: chronic obstructive pulmonary disease, CRP: C-reactive protein, CVD: cardiovascular disease, eGFR: estimated glomerular filtration rate, HDL: high density lipoprotein, SBP: systolic blood pressure.
